# Supplementary material for: The Improved Comparative Reactivity Method (ICRM): measurements of OH reactivity at high-NO X conditions in ambient air
Source: Copernicus journal article supplement (doi:10.5194/amt-2020-437), 2020-11-06
Supplement: Supplementary file 1 [file amt-2020-437-supplement.pdf]

**The Improved Comparative Reactivity Method (ICRM):  
measurements of OH reactivity at high-NO<sub>x</sub> conditions in  
ambient air**

**Wenjie Wang<sup>1,3#</sup>, Jipeng Qi<sup>1,2#</sup>, Jun Zhou<sup>1,2</sup>, Bin Yuan<sup>1,2\*</sup>, Yuwen Peng<sup>1,2</sup>, Sihang Wang<sup>1,2</sup> Jonathan Williams<sup>4</sup>, Vinayak Sinha<sup>5</sup>, Min Shao<sup>1,2</sup>**

<sup>1</sup>Institute for Environmental and Climate Research, Jinan University, Guangzhou 511443, China.

<sup>2</sup>Guangdong-Hongkong-Macau Joint Laboratory of Collaborative Innovation for Environmental Quality, Guangzhou 511443, China.

<sup>3</sup>Multiphase Chemistry Department, Max Planck Institute for Chemistry, Mainz 55128, Germany.

<sup>4</sup>Atmospheric Chemistry Department, Max Planck Institute for Chemistry, Mainz 55128, Germany.

<sup>5</sup>Department of Earth and Environmental Sciences, Indian Institute of Science Education and Research (IISER), Mohali 140306, India.

#W.J.W. and J.P.Q. contributed equally to this work.

\*Correspondence to: byuan@jnu.edu.cn

## 1. Calculation of $X_R$

Due to the variation of reagent ion source and sample humidity, the pyrrole ( $C_4H_5N$ ) ion signal is normalized to a standard reagent ion signal of  $10^6$  counts/s (cps) as following in Eq. 1.

$$Pyrrole_{ncps} = \frac{i[C_4H_5NH^+] \times 10^6}{i[H_3O^+] + X_R \times i[H_3O^+H_2O]} \quad (1)$$

Where  $Pyrrole_{ncps}$  is a normalized signal of the pyrrole, and  $i[C_4H_5NH^+]$ ,  $i[H_3O^+]$ , and  $i[H_3O^+H_2O]$  represent the signals of different product ions, respectively. The value of  $X_R$  not only represents difference in detection efficiencies of detector, but also the difference in rate coefficients of the proton transfer reactions  $H_3O^+ + \text{pyrrole}$  and  $H_3O^+(H_2O) + \text{pyrrole}$  (de Gouw et al., 2003; de Gouw et al., 2007).

Here, the  $X_R$  value of pyrrole was determined by the laboratory experiment. The  $i[C_4H_5NH^+]$ ,  $i[H_3O^+]$ , and  $i[H_3O^+H_2O]$  were measured from a dry (0%) to 100% humidified pyrrole standard gas, respectively. The pyrrole signal become independent of relative humidity when normalized to  $i[H_3O^+] + X_R \times i[H_3O^+H_2O]$ . In other words, the correlation coefficient ( $r^2$ ) of relative humidity and normalized pyrrole signal reaches a minimum at the optimized  $X_R$  value. This method is inspired by the calculation of enhancement ratios and the source contribution of different species in the previous studies (Millet et al., 2005; Yuan et al., 2010). Figure S1 (a) shows the result of the correlation coefficient of at different  $X_R$  with a bin of 0.01 values. We found that  $r^2$  is the smallest when the  $X_R$  value is 0. Figure S1 (b) shows the time series of pyrrole signals before and after normalizing to  $i[H_3O^+] + X_R \times i[H_3O^+H_2O]$ , respectively. It is shown that pyrrole signal reaches a stable level after normalized with the increase of relative humidity. Therefore, the  $X_R$  value is determined as 0.

**Table S1.** The list of all species used to calculate OH reactivity in this study.

| Species name           | Species name           | Species name           |
|------------------------|------------------------|------------------------|
| <b>Alkanes</b>         | n-Undecane             | 1,2,3-Trimethylbenzene |
| Ethane                 | n-Dodecane             | p-Diethylbenzene       |
| Propane                | <b>Alkenes</b>         | m-Diethylbenzene       |
| iso-Butane             | Ethene                 | <b>Alkyne</b>          |
| n-Butane               | Propene                | Acetylene              |
| iso-Pentane            | cis-2-Butene           | <b>OVOCs</b>           |
| n-Pentane              | trans-2-Butene         | Formaldehyde           |
| Cyclopentane           | 1-Butene               | Methanol               |
| 2-Methylpentane        | 1-Pentene              | Acetaldehyde           |
| n-Hexane               | Isoprene               | Ethanol                |
| Cyclohexane            | cis-2-Pentene          | Acrolein               |
| 2,2-Dimethylbutane     | trans-2-Pentene        | Acetone                |
| 2,3-Dimethylbutane     | 1-Hexene               | Propanol               |
| 3-Methylpentane        | <b>Aromatics</b>       | Furan                  |
| 3-Methylhexane         | Benzene                | MVK+MACR               |
| 2,2,4-Trimethylpentane | Toluene                | MEK                    |
| Methylcyclopentane     | Ethylbenzene           | Pentanones             |
| n-Heptane              | x, p-Xylene            | Phenol                 |
| Methylcyclohexane      | Styrene                | 2-Furaldehyde          |
| 2,3,4-Trimethylpentane | o-Xylene               | Benzyl alcohol         |
| 2-Methylheptane        | n-Propylbenzene        | <b>Inorganics</b>      |
| 3-Methylheptane        | isopropylbenzene       | CO                     |
| 2,4-Dimethylpentane    | o-Ethyltoluene         | NO                     |
| 2,3-Dimethylpentane    | m-Ethyltoluene         | NO <sub>2</sub>        |
| 2-Methylhexane         | p-Ethyltoluene         | SO <sub>2</sub>        |
| n-Octane               | 1,2,4-Trimethylbenzene | O <sub>3</sub>         |
| n-Decane               | 1,3,5-Trimethylbenzene |                        |

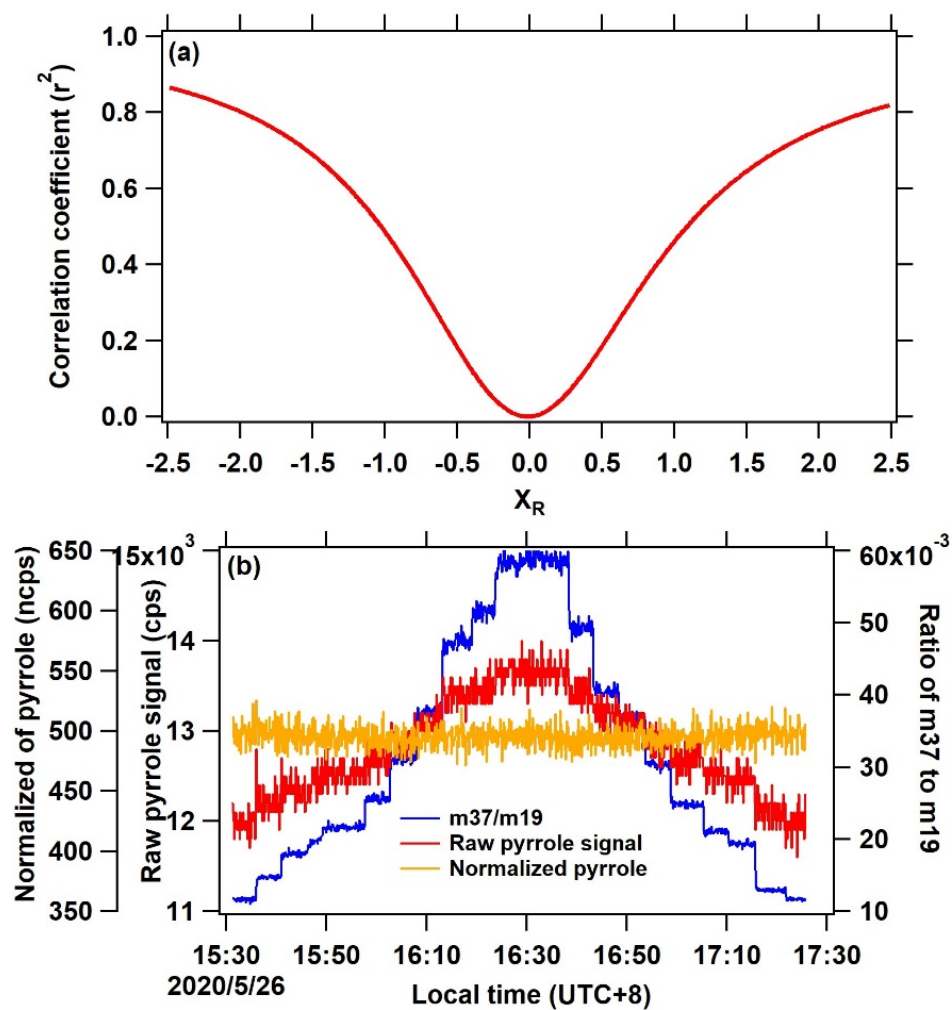

48

49 **Figure S1.** (a) The horizontal represents different  $X_R$  values (from -2.5 to 2.5). The  
50 vertical represents the correlation coefficient that pyrrole is normalized to  $H_3O^+$  signals  
51 and m37/m19 at different  $X_R$  values. (b) The time series of the signal of pyrrole in cps  
52 (red) and in ncps (yellow, normalized to m19 and m37) with the change of humidity  
53 (blue, represented as the ratio of m37 to m19).

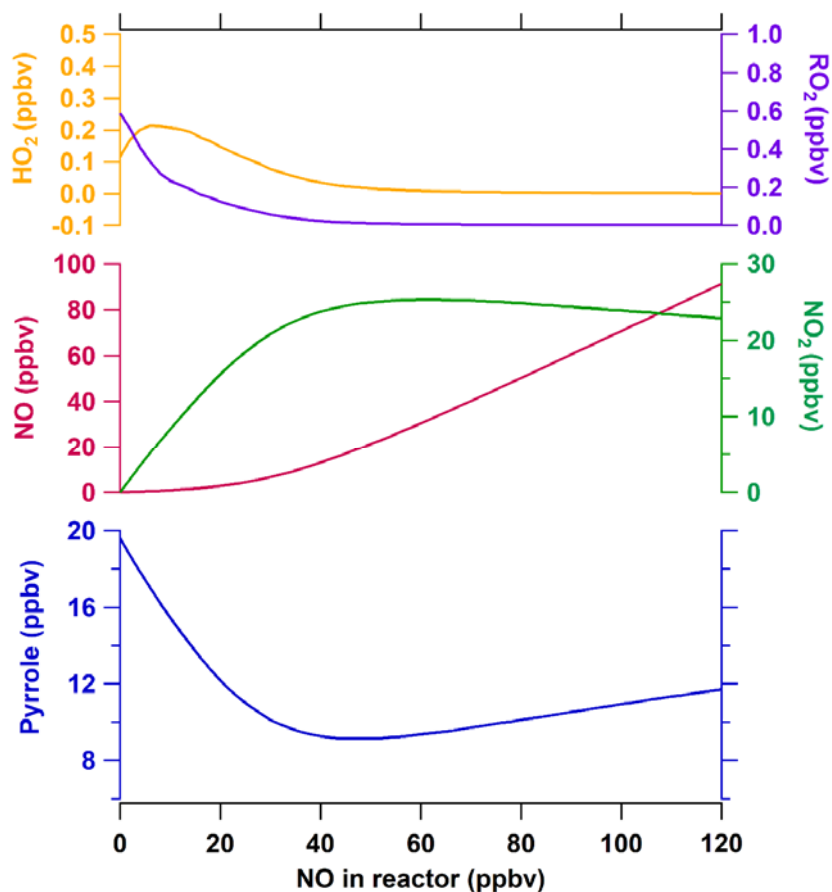

**Figure S2.** The remaining concentrations of pyrrole, NO,  $\text{NO}_2$ ,  $\text{HO}_2$ , and  $\text{RO}_2$  outflowing of the reactor (with the reaction time of  $\sim 11$  s) as a function of introduced NO in the reactor.

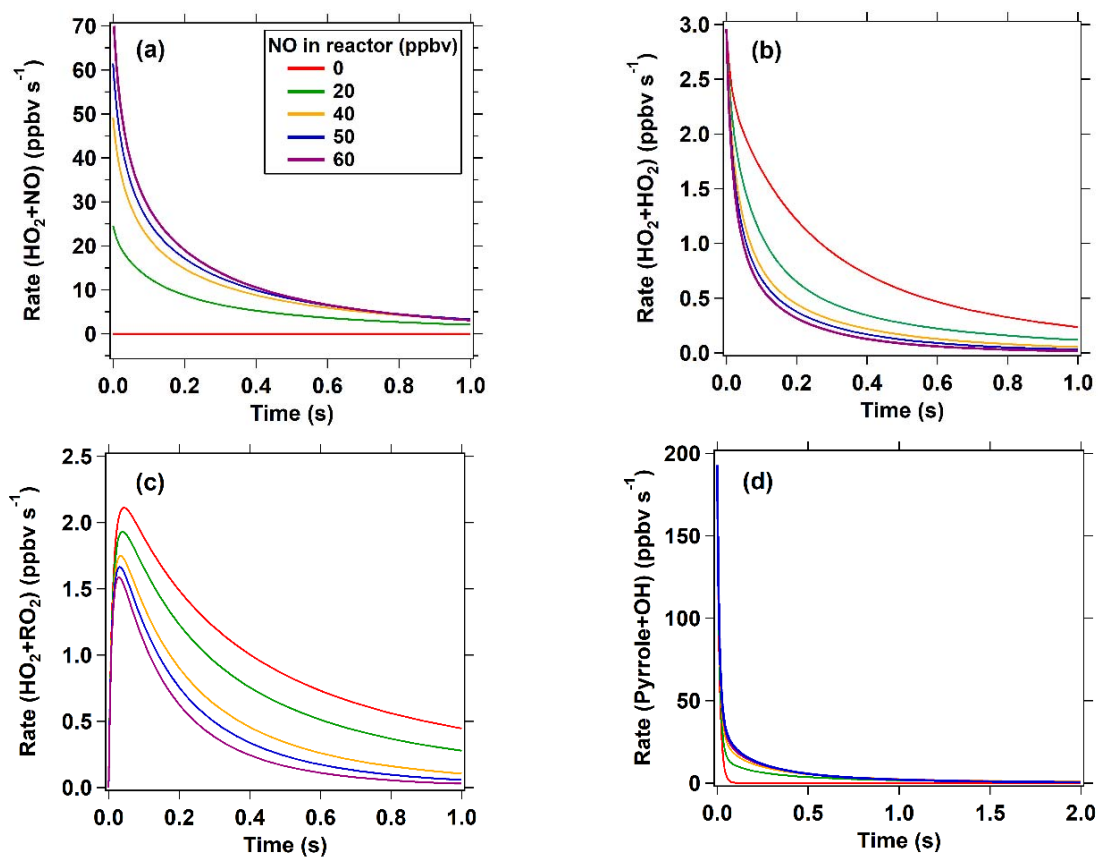

**Figure S3.** The reaction rates of  $\text{HO}_2 + \text{NO}$ ,  $\text{HO}_2 + \text{HO}_2$ ,  $\text{HO}_2 + \text{RO}_2$  and  $\text{Pyrrole} + \text{OH}$  as a function of reaction time in the reactor. Four levels of introduced NO concentrations (0, 20, 40, 50, 60 ppbv) was selected. The reaction time ranging from 0 to 1s is displayed due to the high reaction rates mainly occurred during this period.

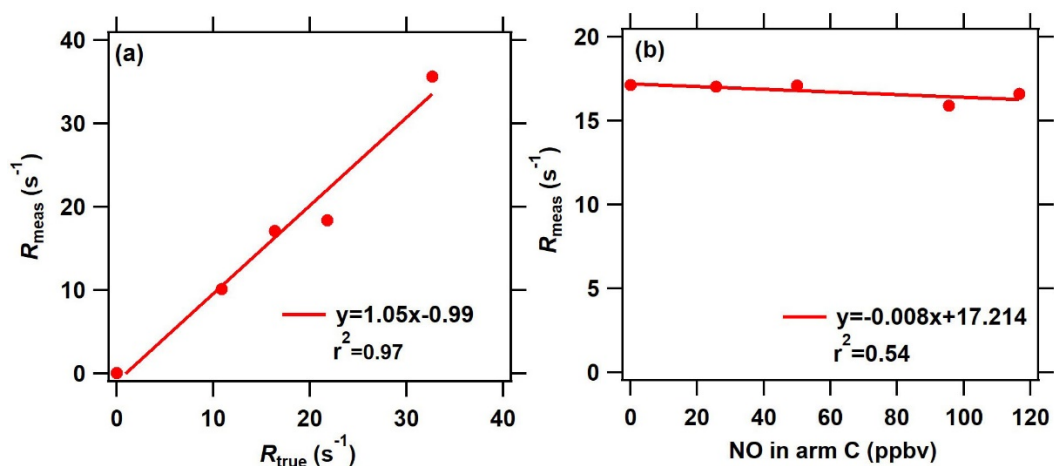

**Figure S4. (a)** The OH reactivity calibration of  $\text{NO}_2$ , **(b)** Comparison of measured and true OH reactivity of  $\text{NO}_2$  at different NO concentrations introduced through arm C in ICRM system.

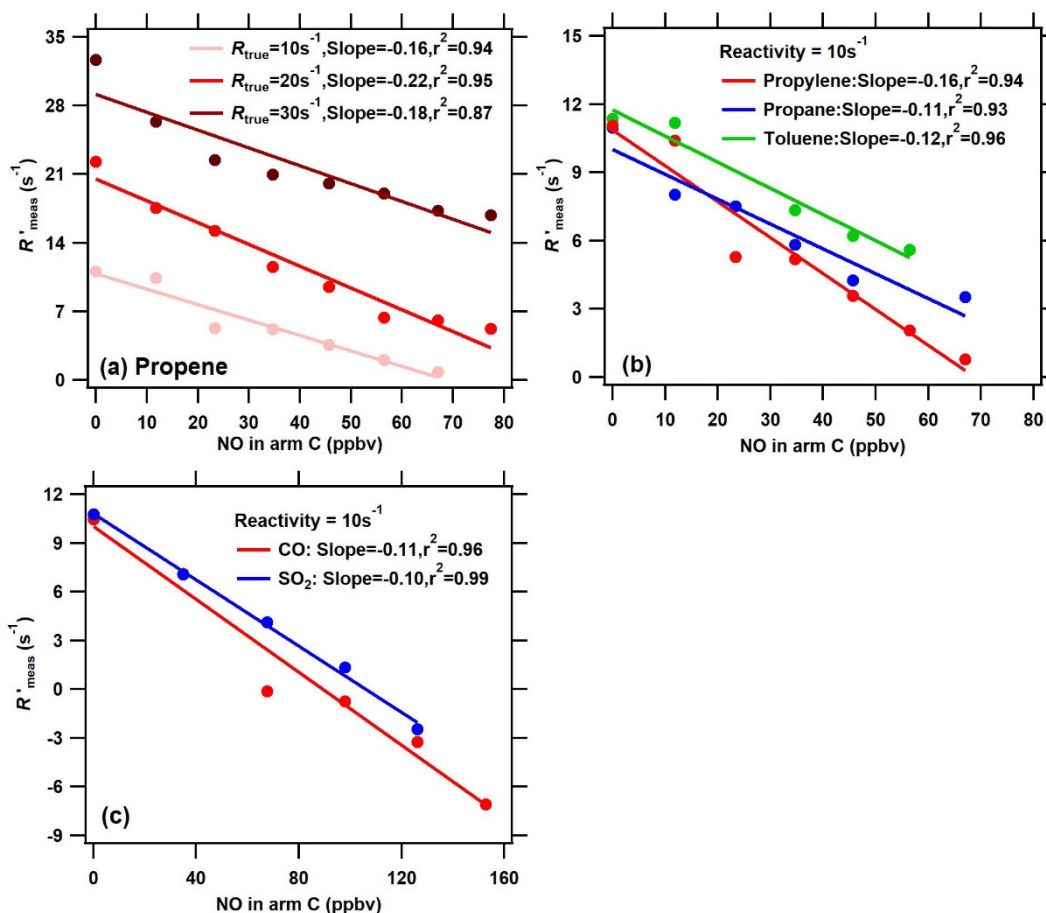

**Figure S5.** The corrected measured reactivity ( $R'_{\text{meas}}$ ) using the calibration factor  $\alpha_3$  ( $R'_{\text{meas}} = (\frac{1}{\alpha_3} * R_{\text{meas}})$ ) as a function of NO concentrations at (a) different levels of VOCs reactivity for the same species (propene) and (b) different VOCs species for the same OH reactivity level ( $10 \text{ s}^{-1}$ ); (c) The response of the  $R'_{\text{meas}}$  to NO concentrations at different inorganic species for the same OH reactivity level ( $10 \text{ s}^{-1}$ ). The NO, CO, SO<sub>2</sub>, and VOCs were introduced into the reactor through arm C.



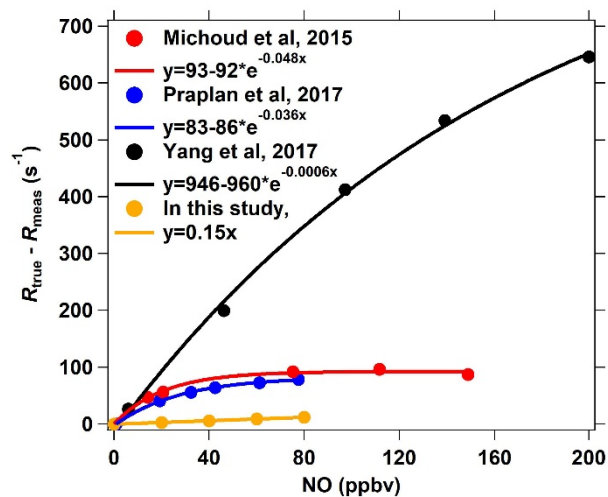

**Figure S6.** The effect of NO on the difference between true reactivity and measured OH reactivity ( $R_{\text{true}} - R_{\text{meas}}$ ) in the original CRM system. In this study, to correct the systematic deviation at ambient NO=0, the  $R_{\text{true}} - R_{\text{meas}}$  is defined as the difference between true OH reactivity ( $R_{\text{true}}$ ) and the corrected measured OH reactivity ( $R'_{\text{meas}}$ ) using the calibration factor  $\alpha_1$  ( $R'_{\text{meas}} = (\frac{1}{\alpha_1} * R_{\text{meas}})$ ).

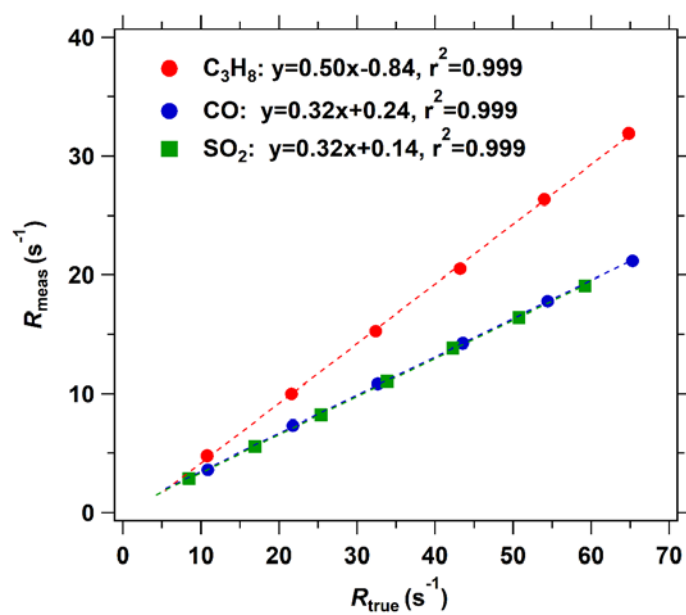

83

84 **Figure S7.** Linear correlation between measured and true OH reactivity of propane,

85  $\text{CO}$ , and  $\text{SO}_2$  simulated by box-model.

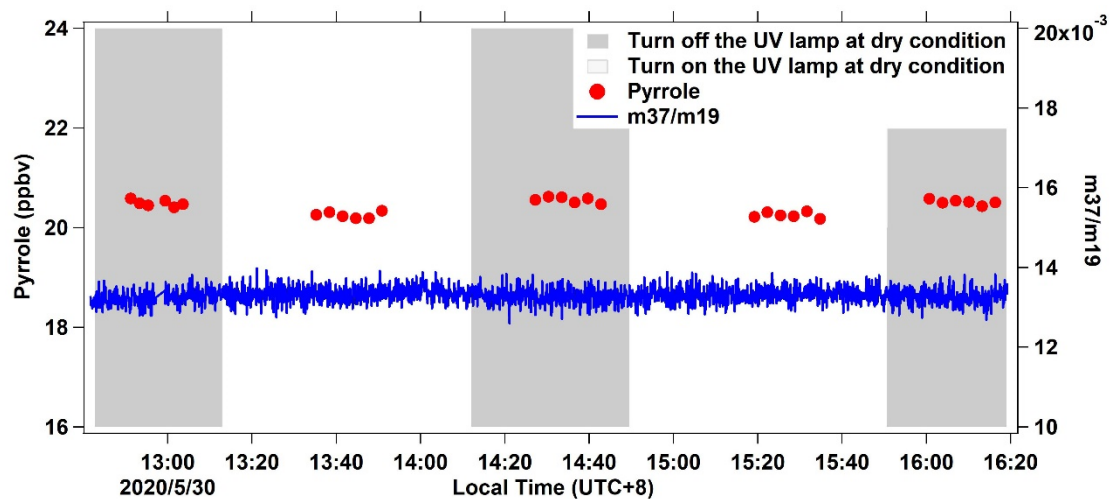

**Figure S8.** The variation in pyrrole concentration due to photolysis effect in the ICRM system. Two modes were tested by turning on and off the mercury lamp at dry condition (no humidification).

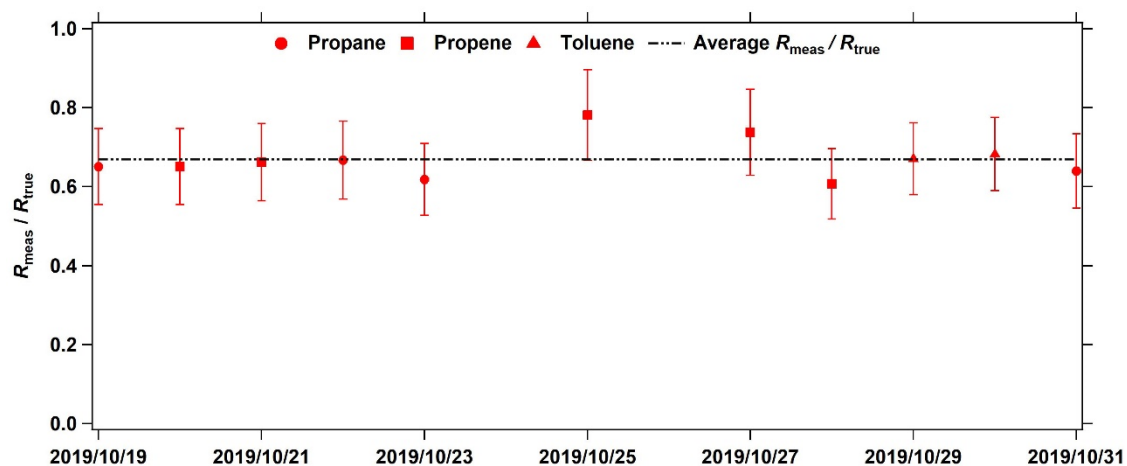

**Figure S9.** The daily calibration of measured reactivity during the field campaign at Heshan site. The ratio of  $R_{\text{meas}}$  to  $R_{\text{true}}$  ( $R_{\text{meas}}/R_{\text{true}}$ ) of each day is given. The dashed line represents the average value of  $R_{\text{meas}}/R_{\text{true}}$  during the measurement. Three VOC standard gases (propane, propene and Toluene) were used for the calibration.

## References

- de Gouw, J. and Warneke, C.: Measurements of volatile organic compounds in the earth's atmosphere using proton-transfer-reaction mass spectrometry, *Mass Spectrom Rev*, 26, 223-257, 2007.
- de Gouw, J. A., Goldan, P. D., Warneke, C., Kuster, W. C., Roberts, J. M., Marchewka, M., Bertman, S. B., Pszenny, A. A. P., and Keene, W. C.: Validation of proton transfer reaction-mass spectrometry (PTR-MS) measurements of gas-phase organic compounds in the atmosphere during the New England Air Quality Study (NEAQS) in 2002, *Journal of Geophysical Research: Atmospheres*, 108, 2003.
- Millet, D. B. and Neil M. Donahue, S. N. P., Andrea Polidori, Charles O. Stanier, Barbara J. Turpin, Allen H. Goldstein: Atmospheric volatile organic compound measurements during the Pittsburgh Air Quality Study: Results, interpretation, and quantification of primary and secondary contributions, *Journal of Geophysical Research*, 110, 1-17, 2005.
- Yuan, B., Liu, Y., Shao, M., Lu, S., and Streets, D. G.: Biomass Burning Contributions to Ambient VOCs Species at a Receptor Site in the Pearl River Delta (PRD), China, *Environmental Science & Technology*, 44, 4577-4582, 2010.
